# Supplementary material
Source: PubMed Central journal article supplement (PMC6200589)
Supplement: NIHMS990220-supplement-ESI.pdf [file NIHMS990220-supplement-ESI.pdf]

Copyright WILEY-VCH Verlag GmbH & Co. KGaA, 69469 Weinheim, Germany, 2016.

## Supporting Information

### **Graphene-based biosensor for On-chip detection of Bio-orthogonally Labeled Proteins to Identify the Circulating Biomarkers of Aging during Heterochronic Parabiosis.**

*Corinne Sadlowski<sup>a</sup> †, Sarah Balderston<sup>b,c</sup> †, Mandeep Sandhu<sup>b,c</sup> †, Reza Hajian<sup>b</sup>, Chao Liu<sup>a</sup>, Thanhtra P. Tran<sup>b</sup>, Michael J. Conboy<sup>a</sup>, Jacobo Paredes<sup>d</sup>, Niren Murthy<sup>a</sup>, Irina M. Conboy<sup>a\*</sup>, Kiana Aran<sup>a,b\*</sup>*

<sup>a</sup> *University of California, Berkeley, Berkeley CA*

<sup>b</sup> *Keck Graduate Institute, Claremont Colleges, Claremont CA*

<sup>c</sup> *Scripps College, Claremont Colleges, Claremont CA*

<sup>d</sup> *Universidad de Navarra, San Sebastián, Spain*

*\* Senior corresponding authors: [iconboy@berkeley.edu](mailto:iconboy@berkeley.edu) and [karan@kgi.edu](mailto:karan@kgi.edu)*

### Synthesis of PEG azide

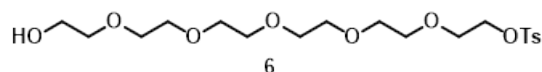

*17-hydroxy-3,6,9,12,15-pentaoxaheptadecyl 4-methylbenzenesulfonate* (**6**). Hexaethylene glycol (2.6 g, 9.15 mmol, 1 equiv), TsCl (1.93 g, 11.1 mmol, 1.1 equiv), Ag<sub>2</sub>O (3.20 g, 13.8 mmol, 1.5 equiv), and KI (0.306 g, 1.8 mmol, 0.2 equiv) were suspended in dichloromethane (90 mL) and stirred under N<sub>2</sub> overnight at room temperature. The reaction was concentrated and purified via column chromatography on silica gel eluting at 2:3 hexanes: acetone to yield 2.14 g of clear yellow oil (53.6%). <sup>1</sup>H NMR (400 MHz, CDCl<sub>3</sub>, ppm) δ 7.75 (d, *J* = 8.3 Hz, 2H), 7.31 (d, *J* = 8.8 Hz, 2H), 4.08-4.15 (m, 2H), 3.46-3.73 (m, 25H), 2.72 (s, 1H), 2.41 (s, 3H). <sup>13</sup>C NMR (400 MHz, CDCl<sub>3</sub>) δ 144.9, 133.0, 129.9, 128.0, 72.6, 70.8, 70.7, 70.6, 70.4, 69.3, 68.7, 61.8, 21.7. HRMS (ESI) *m/z* calculated for: [C<sub>19</sub>H<sub>32</sub>O<sub>9</sub>S]<sup>+</sup>: 437.516. Found: 437.1832 (Δ 0.3328).

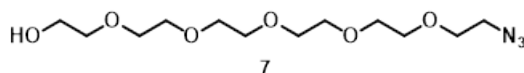

*17-azido-3,6,9,12,15-pentaoxaheptadecan-1-ol* (**7**). To a solution of compound **6** (5.68 g, 13.06 mmol, 1 equiv) in DMF (60 mL) was added NaN<sub>3</sub> (21.0 g, 326.5 mmol, 1 equiv). The reaction mixture stirred at 50 °C overnight under N<sub>2</sub>, and was then filtered through celite to yield 1.13 g of a clear yellow oil (28%). <sup>1</sup>H NMR (400 MHz, CDCl<sub>3</sub>, ppm) δ 3.49 (t, *J* = 4.5 Hz, 1H), 2.70-2.95 (m, 22H), 2.56 (t, *J* = 4.9 Hz, 2H). <sup>13</sup>C NMR (400 MHz, CDCl<sub>3</sub>) δ 162.6 (DMF), 72.6, 70.6, 70.4, 70.4, 70.2, 70.0, 36.6 (DMF), 31.4 (DMF). HRMS (ESI) *m/z* calculated for: [C<sub>12</sub>H<sub>25</sub>N<sub>3</sub>O<sub>6</sub>Na]<sup>+</sup>: 330.3470. Found: 330.1630 (Δ 0.1840).

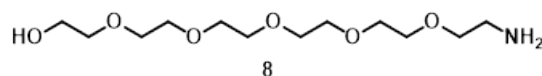

*17-amino-3,6,9,12,15-pentaoxaheptadecan-1-ol* (**8**). To a solution of compound **7** (1.23 g, 4.00 mmol, 1 equiv) in MeOH (20 mL) was added 7N NH<sub>3</sub> (572 μL, 4.00 mmol, 1 equiv) and 10%

Pd/C (0.085 g, 0.800 mmol, 0.2 equiv). The reaction mixture was stirred under 800 PSI overnight, and then was filtered through celite and concentrated to yield 0.815 g of a clear yellow oil (72.4%). <sup>1</sup>H NMR (400 MHz, CDCl<sub>3</sub>, ppm) δ 3.13-3.63 (m, 20H), 2.34-2.75 (m, 4H). <sup>13</sup>C NMR (400 MHz, CDCl<sub>3</sub>, ppm) δ 72.9, 72.7, 70.3, 70.1, 70.0, 60.9, 41.3. HRMS (EI) m/z calculated for: C<sub>12</sub>H<sub>27</sub>NO<sub>6</sub>: 281.3490. Found: 282.1907. (Δ 0.8417).

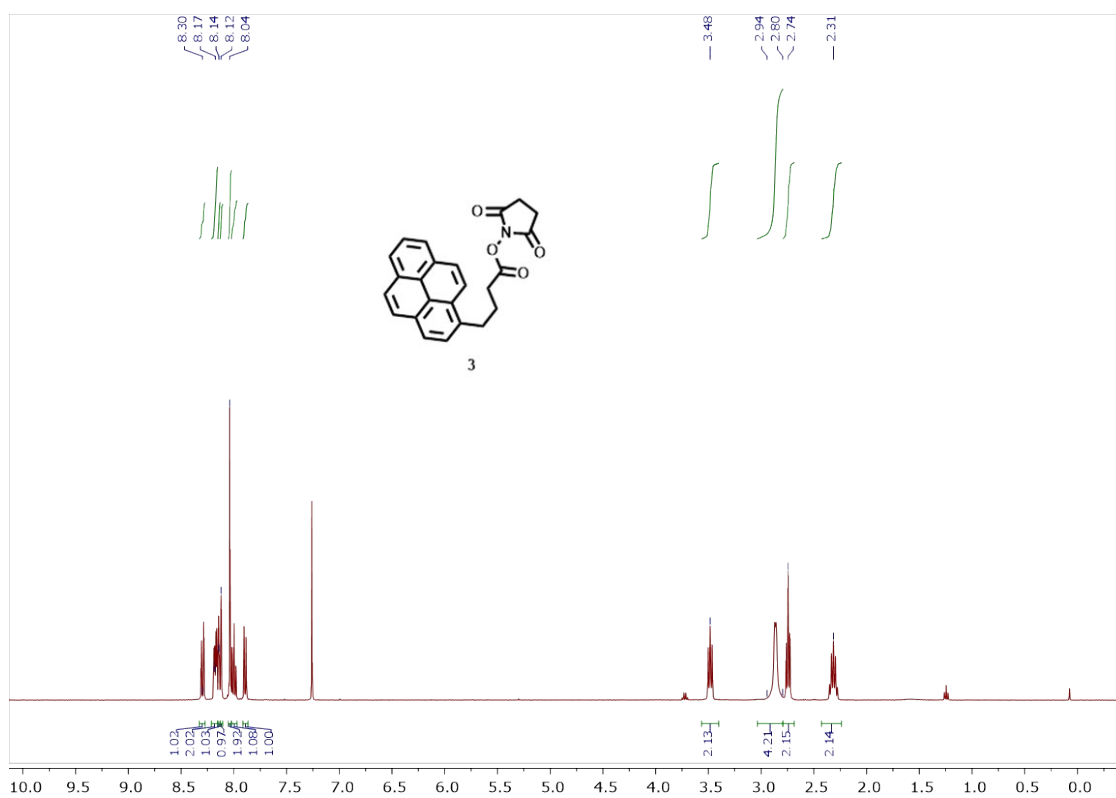

**Figure S1:** <sup>1</sup>H NMR spectrum of 2,5-dioxopyrrolidin-1-yl 4-(pyren-1-yl)butanoate (**3**) in CDCl<sub>3</sub>.

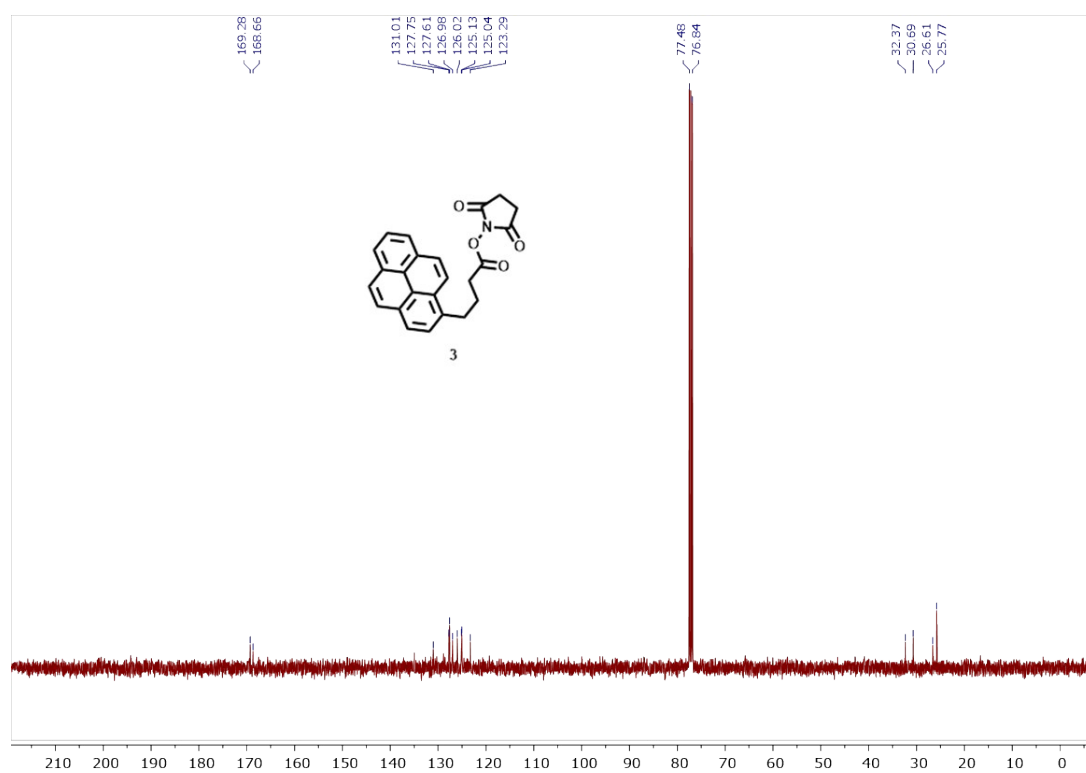

**Figure S2:** <sup>13</sup>C NMR spectrum of 2,5-dioxopyrrolidin-1-yl 4-(pyren-1-yl)butanoate (**3**) in CDCl<sub>3</sub>.

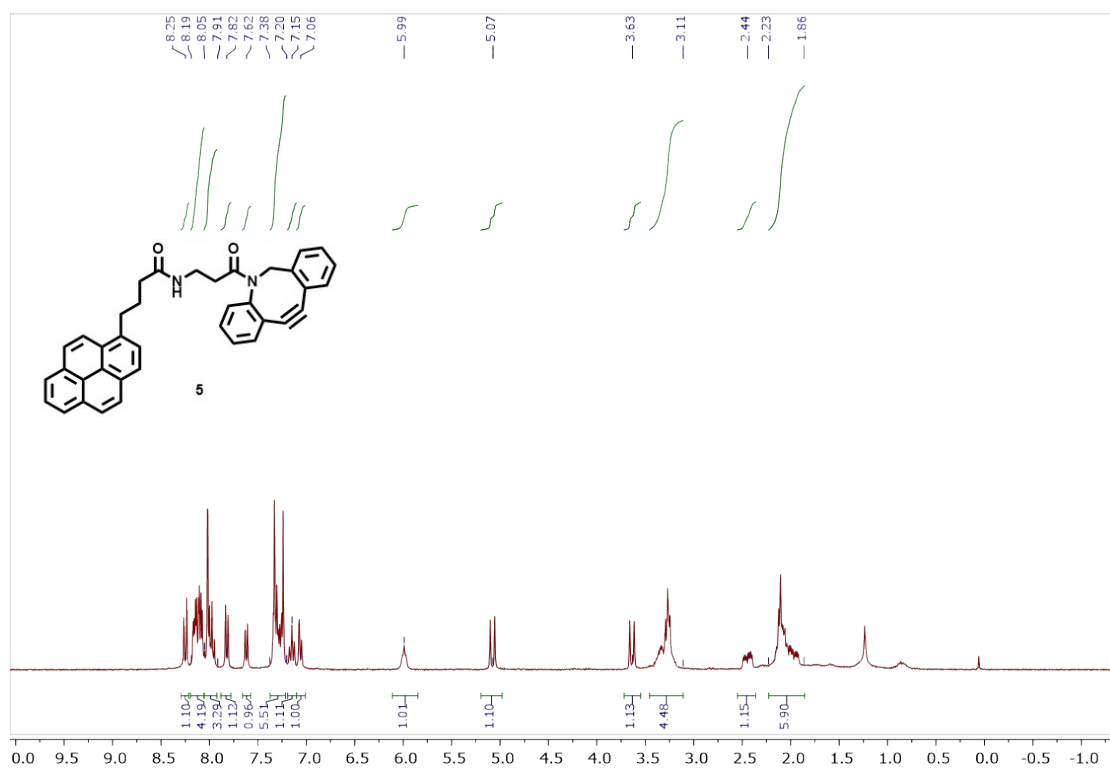

**Figure S3:** <sup>1</sup>H NMR spectrum of dibenzocyclooctyne-amine (**5**) in CDCl<sub>3</sub>.

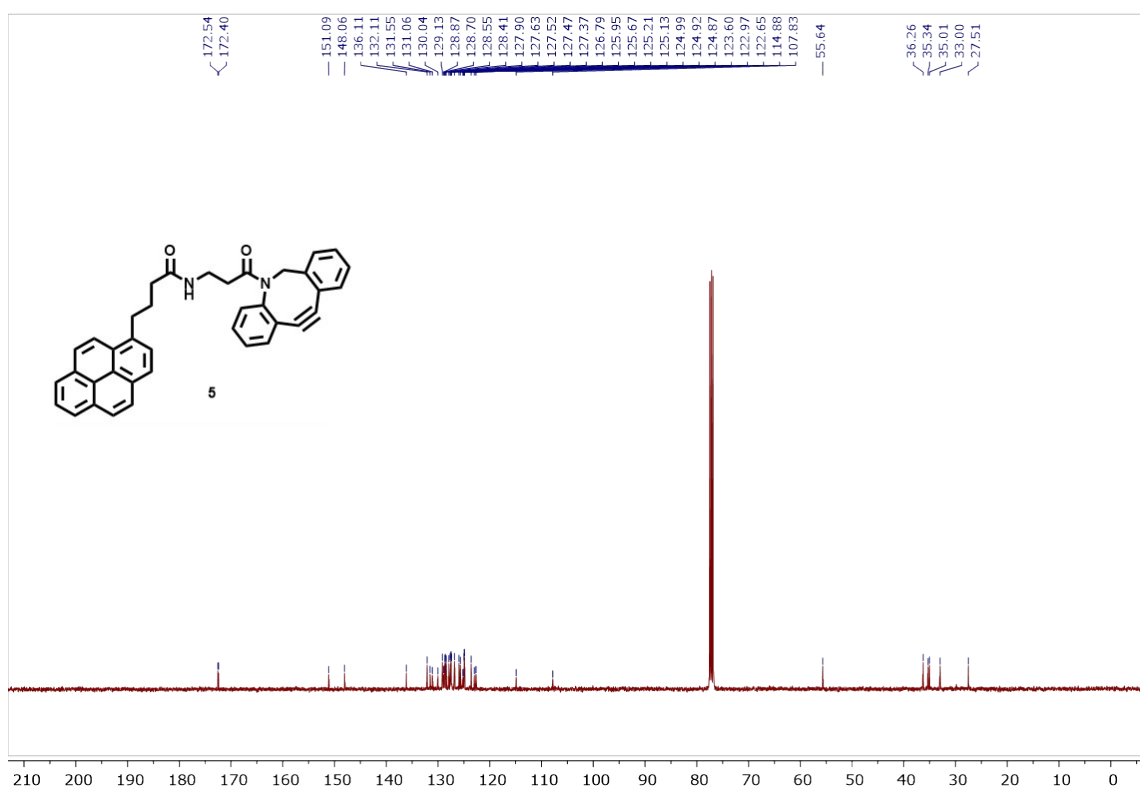

**Figure S4:** <sup>13</sup>C NMR spectrum of dibenzocyclooctyne-amine (**5**) in CDCl<sub>3</sub>.

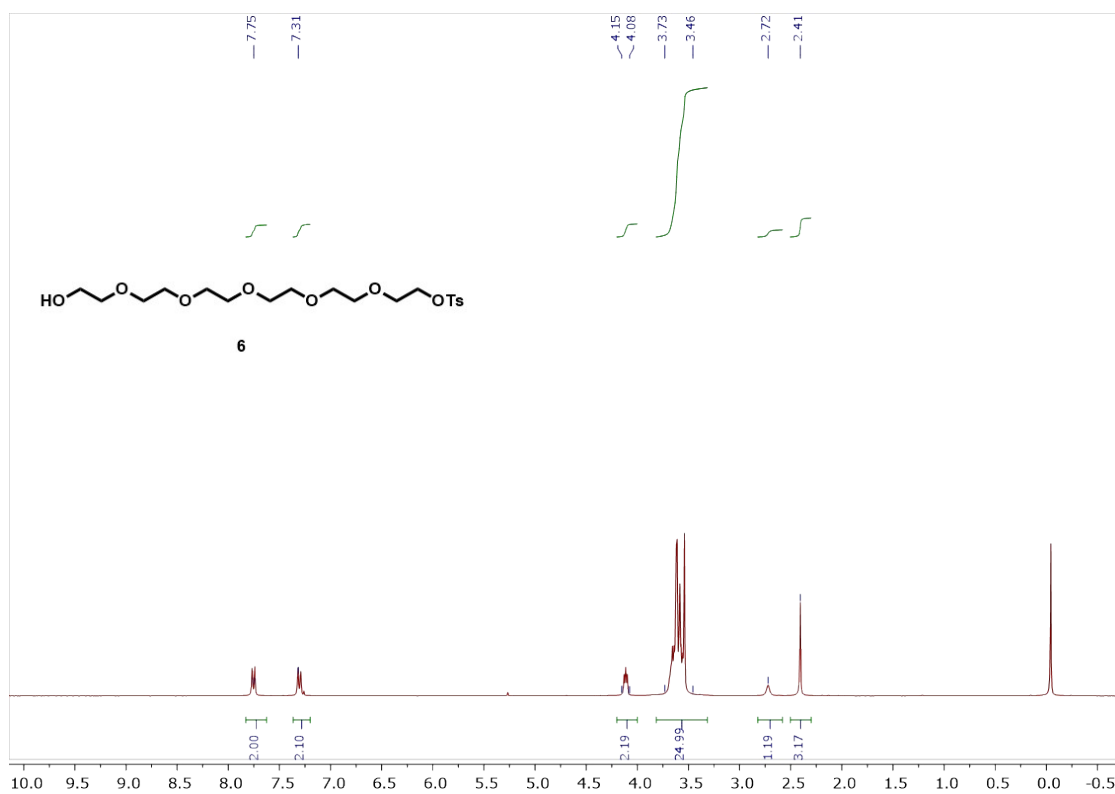

**Figure S5:** <sup>1</sup>H NMR spectrum of 17-hydroxy-3,6,9,12,15-pentaoxaheptadecyl 4-methylbenzenesulfonate (**6**) in CDCl<sub>3</sub>.

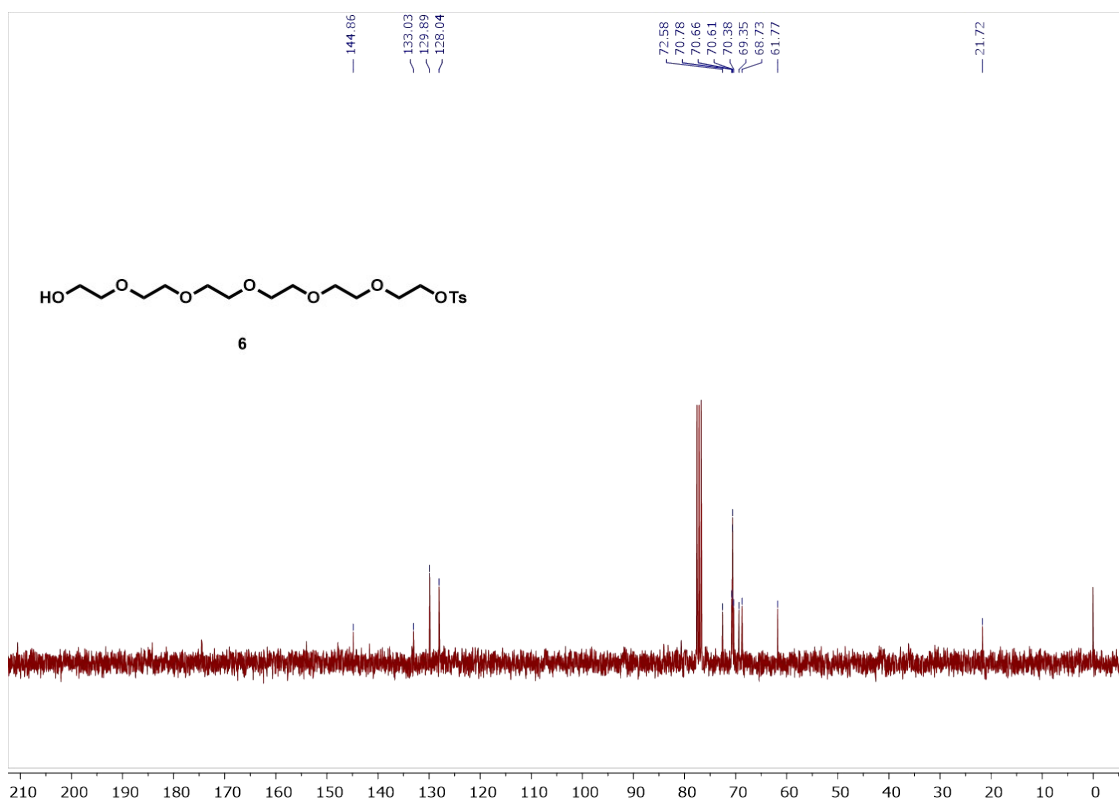

**Figure S6:** <sup>13</sup>C NMR spectrum of 17-hydroxy-3,6,9,12,15-pentaoxaheptadecyl 4-methylbenzenesulfonate (**6**) in CDCl<sub>3</sub>.

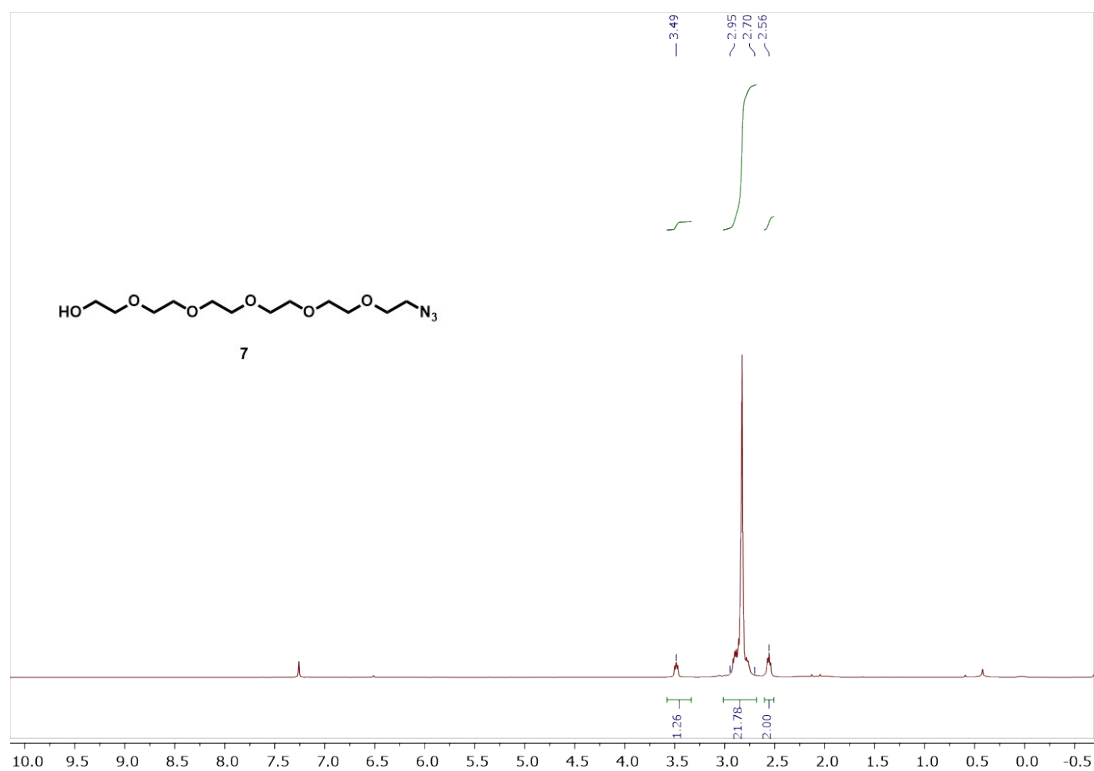

**Figure S7:** <sup>1</sup>H NMR spectrum of 17-azido-3,6,9,12,15-pentaoxaheptadecan-1-ol (7) in CDCl<sub>3</sub>.

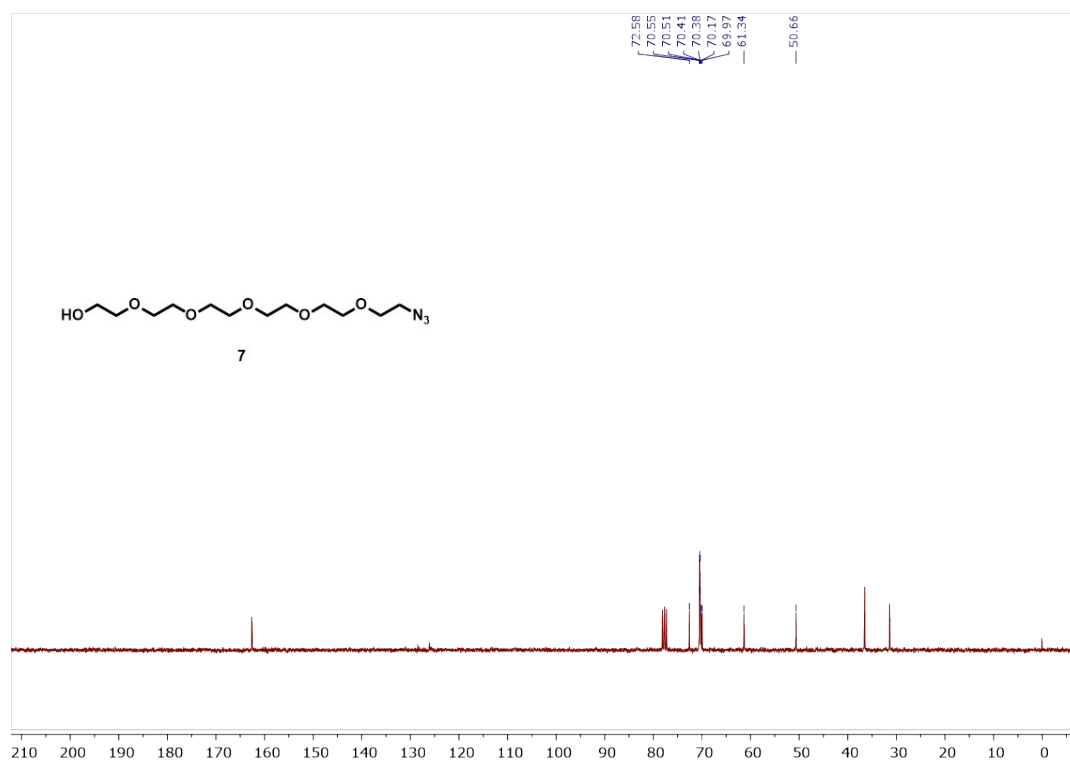

**Figure S8:** <sup>13</sup>C NMR spectrum of 17-azido-3,6,9,12,15-pentaoxaheptadecan-1-ol (7) in CDCl<sub>3</sub>.

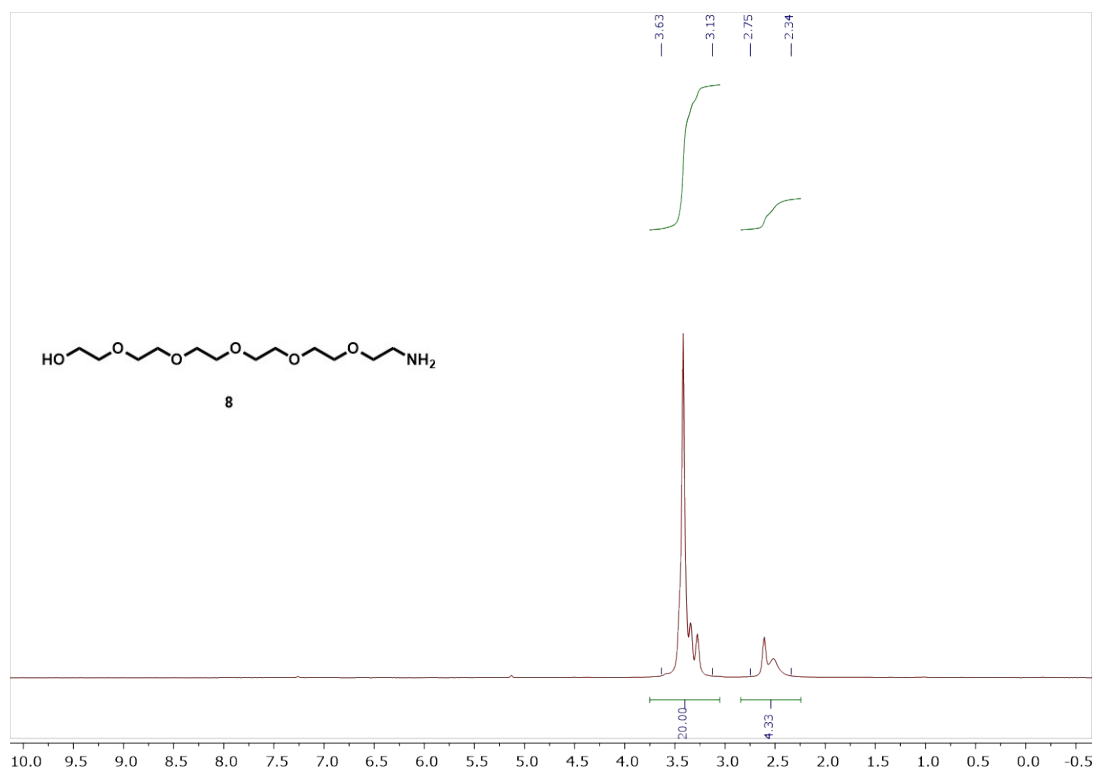

**Figure S9:** <sup>1</sup>H NMR spectrum of 17-amino-3,6,9,12,15-pentaoxaheptadecan-1-ol (**8**) in CDCl<sub>3</sub>.

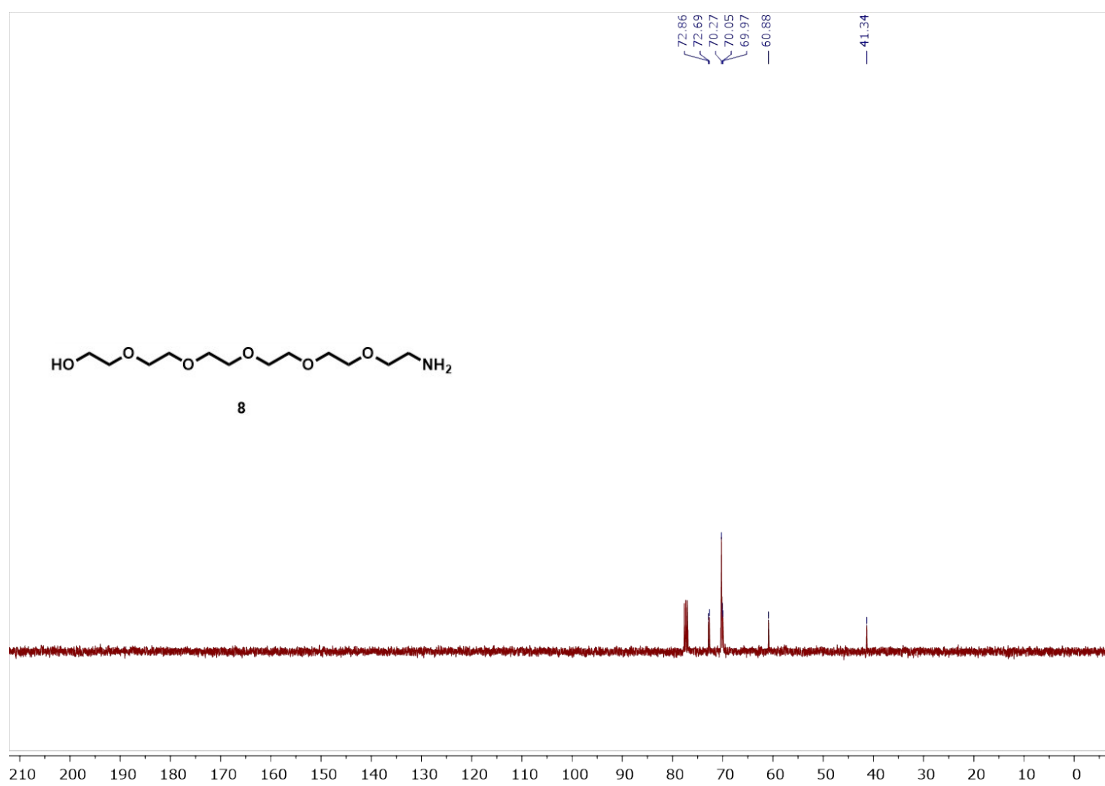

**Figure S10:** <sup>13</sup>C NMR spectrum of 17-amino-3,6,9,12,15-pentaoxaheptadecan-1-ol (**8**) in CDCl<sub>3</sub>.



|                                       | Sample                                                     | M(23-ANL) count | M count     | Putative ANL tag rate |
|---------------------------------------|------------------------------------------------------------|-----------------|-------------|-----------------------|
| Serum samples                         | MetRS <sup>L274G</sup>                                     | 9               | 2469        | 0.0036452             |
|                                       | C57.BI/6 untreated mouse1                                  | 6               | 5032        | 0.001192369           |
|                                       | C57.BI/6 untreated mouse2                                  | 56              | 6573        | 0.008519702           |
| Serum sample with 95% filter          | Old C57.BI/6 partner of young MetRS <sup>L274G</sup> mouse | 55              | 6466        | 0.008506032           |
|                                       | Old C57.BI/6 partner of young C57.BI/6 mouse               | 4               | 1647        | 0.002428658           |
|                                       | MetRS <sup>L274G</sup> parabiont                           | 3               | 3760        | 0.000797872           |
|                                       | C57.BI/6 female mouse single                               | 4               | 444         | 0.009009009           |
|                                       | Young C57.BI/66 partner of old C57.BI/6 parabiont          | 1               | 4001        | 0.000249938           |
|                                       | MetRS <sup>L274G</sup>                                     | 3               | 2360        | 0.001271186           |
|                                       | YFP transgeing mouse, untreated                            | 33              | 6298        | 0.005239759           |
| C57.BI/6 mouse, untreated             | 3                                                          | 2264            | 0.001325088 |                       |
| Muscle samples                        | Old C57.BI/6 partner of young MetRS <sup>L274G</sup> mouse | 117             | 6997        | 0.016721452           |
|                                       | Old C57.BI/6 partner of young C57.BI/6 mouse               | 31              | 2016        | 0.015376984           |
|                                       | MetRS <sup>L274G</sup> parabiont                           | 3               | 3760        | 0.000797872           |
|                                       | C57.BI/6B6 female mouse                                    | 12              | 529         | 0.02268431            |
|                                       | Young C57.BI/66 mouse parabiont                            | 1               | 4001        | 0.000249938           |
|                                       | C57.BI/6 untreated mouse, sample 1 GA                      | 4               | 3564        | 0.001122334           |
|                                       | C57.BI/6 untreated mouse, sample 2 TA                      | 34              | 18285       | 0.001859448           |
|                                       | C57.BI/6 untreated mouse, sample 3 GA                      | 4               | 3683        | 0.001086071           |
| C57.BI/6 untreated mouse, sample 4 TA | 61                                                         | 25585           | 0.002384209 |                       |
| Muscle samples with 95% filter        | C57.BI/6 untreated mouse, sample GA                        | 4               | 3863        | 0.001035465           |
|                                       | C57.BI/6 untreated mouse, sample TA                        | 61              | 25585       | 0.002384209           |
|                                       | MetRS <sup>L274G</sup>                                     | 177             | 7690        | 0.023016905           |
|                                       | Floxed MetRS                                               | 1               | 252         | 0.003968254           |

**Table S1: Discovery of false positive results in Mass Spectrometry downstream of BONCAT.** Tissue samples (blood serum and skeletal muscles Tibialis Anterior (TA) and Gastrocnemius (GA)) were isolated from MetRS<sup>L274G</sup> mice, which are capable of incorporating ANL, as well as Floxed MetRS<sup>L274G</sup> and C57.BI/6 mice, which cannot metabolically label their proteomes with ANL. Additionally, the tissues of old C57.BI/6 mice, which were joined in heterochronic parabiosis with young MetRS<sup>L274G</sup> animals, were examined and compared to those of old C57.BI/6 mice joined to young C57.BI/6 mice. The ANL label was detected by Mass Spectrometry as M23. Upon the typical resolution of 1000s of Methionine-containing (M) peptides (e.g. successful assays) a number of putative M23 – ANL containing peptides were detected, not only in the tissues of MetRS<sup>L274G</sup> mice and their old wild type parabiotic partners (*blue outlines*), but also unexpectedly, in the tissues of Floxed mice and C57.BI/6 isogenic parabionts treated with ANL. Even the C57.BI6 mouse tissues not exposed to ANL, which were derived and stored prior to any ANL presence in our laboratory (*red outlines*) showed a number of putative M23 – ANL containing peptides. These false positive results persisted in multiple Mass Spectrometry runs, even when using a high stringency 95% filter. Unless indicated otherwise (e.g. untreated), all tissues were derived from animals and pairs that were administered with ANL in vivo, as detailed in<sup>8</sup>.
